# Supplementary material for: Efficient targeted mutagenesis in the monarch butterfly using zinc-finger nucleases
Source: HighWire-hosted journal article supplement (doi:10.1101/gr.145599.112), 2012-09-25
Supplement: SuppMaterial.docx [file SuppMaterial.docx]

**Supplemental Material**

**Efficient targeted mutagenesis in the monarch butterfly using Zinc Finger Nucleases**

Christine Merlin, Lauren E. Beaver, Orley R. Taylor, Scot A. Wolfe, and Steven M. Reppert

Figure S1: Level of targeted mutagenesis in somatic mosaics injected with 0.1 μg/μl ZFN encoding mRNAs targeting *cry2*.

Figure S2: CRY2GP51 recognizes the N-terminus of the CRY2 protein.

Figure S3: Profiles of adult eclosion during the first two days of constant darkness.

Table S1: Specification of the ZFNs designed to target monarch *cry2*.

**Figure S1:** Level of targeted mutagenesis in somatic mosaics injected with 0.1 μg/μl ZFN encoding mRNAs targeting *cry2*.

(*A*) Gels representing the levels of targeted mutagenesis observed in somatic cells of dead embryos (from a few percent to full targeting; left to right) after injection of ZFN mRNAs targeting *cry2* at 0.1μg/μl. For each panel, the undigested control (C) and the fragment subjected to the restriction enzyme (EagI) are shown. (*B*) Gel pictures representing the level of targeted mutagenesis in somatic cells of the four larvae injected with ZFN mRNAs targeting *cry2* at 0.1μg/μl and selected in Fig. 4A.

**Figure S2.** CRY2GP51 recognizes the N-terminus of the CRY2 protein.

Western blot of V5 epitope–tagged CRY2 protein expression probed by a V5 antibody (left panel) and a monarch-specific anti-CRY2 antibody (CRY2GP51) ([Zhu et al. 2008](#_ENREF_1)) (right panel). The monarch *per* E-box enhancer luciferase reporter (dpPer4Ep; 50ng) was used in the presence (+) or absence (-) of dpCLK/dpCYC expression plasmids (50 ng each) and either the full-length CRY2 (FL-CRY2; 50ng) or truncated CRY2 (Tr-CRY2; 50 ng).

**Figure S3.** Profiles of adult eclosion during the first two days of constant darkness.

Profiles of wild-types (+/+, black), heterozygous mutants (+/-, gray) and CRY2 knockouts (-/-, red) siblings of the 4-bp deletion (*A*) and the 2-bp insertionmutant line (*B*), entrained throughout their larval and pupal stages in LD. Eclosion is binned at 1-hour intervals. Black horizontal bars, dark; gray horizontal bars, subjective day.

**Table S1.** Specification of the ZFNs designed to target monarch *cry2*.

**References:**

Zhu H, Sauman I, Yuan Q, Casselman A, Emery-Le M, Emery P, Reppert SM. 2008. Cryptochromes define a novel circadian clock mechanism in monarch butterflies that may underlie sun compass navigation. *PLoS Biol* **6**, e4.
